# Supplementary material for: Opposing Roles of DCs and iNKT Cells in the Induction of Foxp3 Expression by MLN CD25+CD4+ T Cells during IFNγ-Driven Colitis
Source: Int J Mol Sci. 2022 Dec 5;23(23):15316. doi: 10.3390/ijms232315316 (PMC9738888; doi:10.3390/ijms232315316)
Supplement: Supplementary file 1 [file ijms-23-15316-s001.zip › ijms-1995522-supplementary.pdf]

**Supplementary Materials to:**

**Opposing roles of DCs and iNKT cells in the induction of Foxp3 expression by MLN  
CD25<sup>+</sup>CD4<sup>+</sup> T cells during IFN $\gamma$ -driven colitis**

**This document includes:**

**-Supplementary figures 1-3**

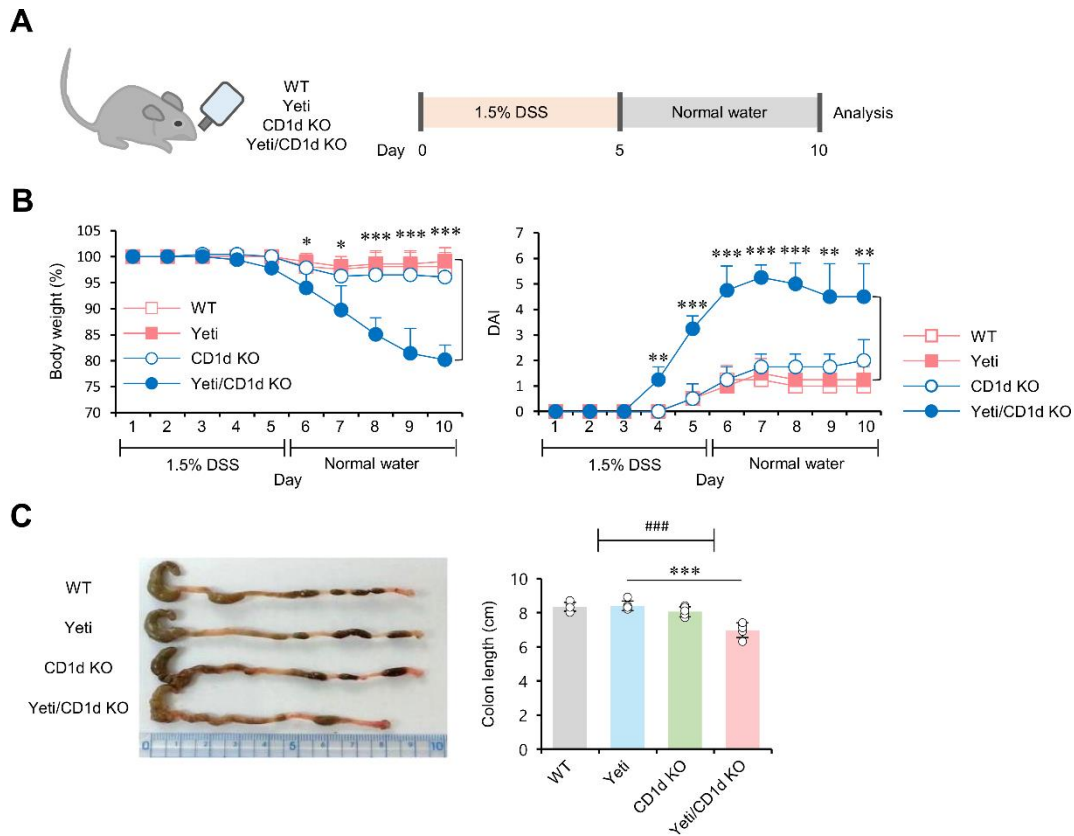

**Figure S1. iNKT cells protect Yeti mice from DSS-induced colitis.**

(A) Experimental outline. WT, Yeti, CD1d KO, and Yeti/CD1d KO mice were treated with 1.5% DSS as described in materials and methods. Daily body weight changes, DAI score (B), and colon length (C) of WT, Yeti, CD1d KO, and Yeti/CD1d KO mice were evaluated after 1.5% DSS treatment. The mean values  $\pm$  SD ( $n = 5$ ; per group in the experiment; Student's  $t$ -test; \*  $P < 0.05$ , \*\*  $P < 0.01$ , \*\*\*  $P < 0.001$ ) are shown. Two-way ANOVA (Yeti  $\times$  iNKT) showed an interaction between these two factors (###  $P < 0.001$ ). One representative experiment of two experiments is shown.

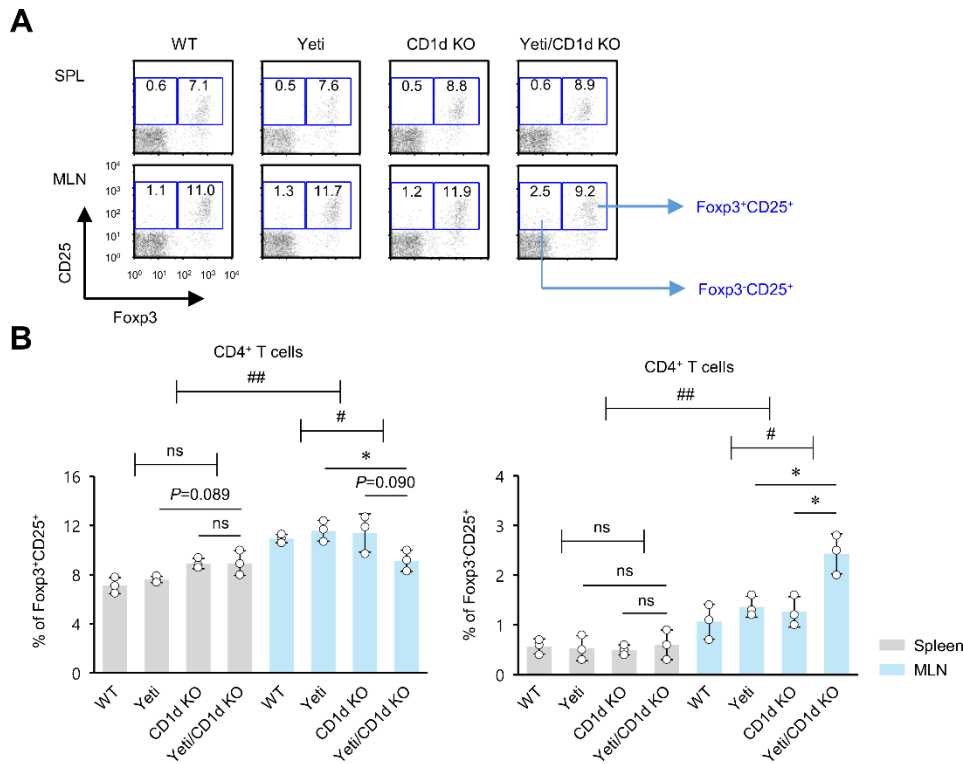

**Figure S2. Foxp3 expression by CD25<sup>+</sup>CD4<sup>+</sup> T cells in the spleen and MLNs of Yeti/CD1d KO mice under steady-state conditions.**

The spleen and mesenteric lymph nodes (MLN) were collected from WT, Yeti, CD1d KO, and Yeti/CD1d KO mice. The percentages of Foxp3<sup>+</sup>CD25<sup>+</sup> and Foxp3<sup>-</sup>CD25<sup>+</sup> subpopulations gated on CD4<sup>+</sup> T cells from the spleen and MLNs of each group were measured by flow cytometry. Representative data (A) and their summary (B) are shown. The mean values  $\pm$  SD ( $n = 3$ ; per group in the experiment; Student's  $t$ -test; \*  $P < 0.05$ ) are shown. Two-way ANOVA (Yeti  $\times$  iNKT) showed an interaction between these two factors ( $^{\#}P < 0.05$ ). Two-way ANOVA (genotype  $\times$  tissue) showed an interaction between these two factors ( $^{\#\#}P < 0.01$ ). ns, not significant.

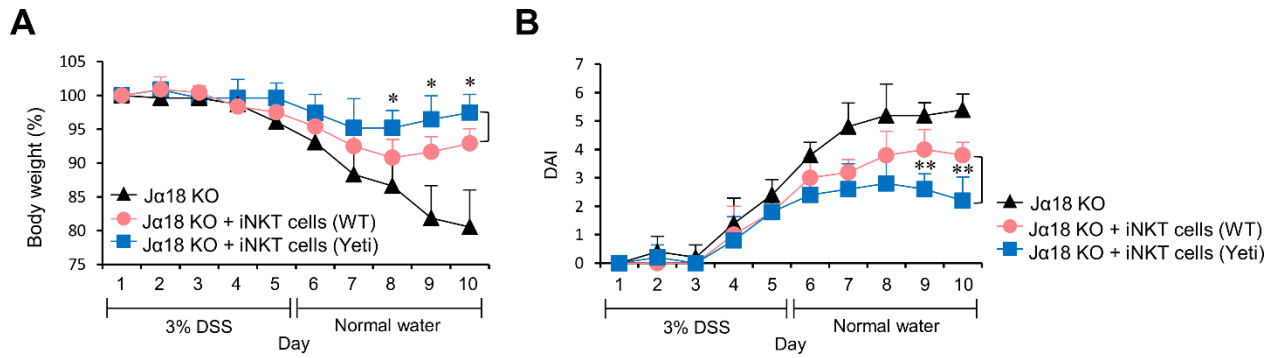

**Figure S3. The suppressive effects of MLN iNKT cells on IFN $\gamma$ -mediated intestinal inflammation.**

iNKT cell-deficient Ja18 KO mice were adoptively transferred with either WT or Yeti MLN iNKT cells ( $2 \times 10^5$ ) and subsequently treated with 3% DSS as described in Materials and Methods. (A) Daily body weight changes and (B) DAI scores of these mice were evaluated. The mean values  $\pm$  SD ( $n = 3$ ; per group in the experiment; Student's  $t$ -test; \*  $P < 0.05$ , \*\*  $P < 0.01$ ) are shown. One representative experiment of two experiments is shown.
